1 **Florida Doulas' Perspectives on their Role in Reducing Maternal Morbidity and Health**  
2 **Disparities**

3 Janelle Applequist, Ph.D., M.A.,<sup>1</sup> Roneé Wilson, PhD,<sup>2</sup> Megan Perkins, IBCLC,<sup>2,3</sup> Charlette  
4 Williams, B.S.,<sup>3</sup> Ria Joglekar, B.S.,<sup>4</sup> Richard Powis, PhD,<sup>2</sup> Angela Daniel, MSSW,<sup>5</sup> Adetola F.  
5 Louis-Jacques, MD<sup>7</sup>

6  
7 <sup>1</sup>Zimmerman School of Advertising & Mass Communications, University of South Florida,  
8 Tampa, FL, USA

9 <sup>2</sup>College of Public Health, University of South Florida, Tampa, FL, USA

10 <sup>3</sup>College of Medicine, University of Florida, Gainesville, FL, USA

11 <sup>4</sup>Morsani College of Medicine, University of South Florida, Tampa, FL, USA

12 <sup>5</sup>Family Centered Birth Services, Gainesville, FL, USA

13 <sup>6</sup>Department of Obstetrics and Gynecology, College of Medicine, University of Florida,  
14 Gainesville, FL, USA

15 **Corresponding Author:**

16 Janelle Applequist

17 University of South Florida

18 4202 E. Fowler Ave.

19 3099 CIS

20 Tampa, FL 33620

21 [applequist@usf.edu](mailto:applequist@usf.edu)

22

23 ***Abstract***

24  
25 *Introduction:* Maternal mortality rates continue to rise in the United States. Considerable racial  
26 disparities exist, as Black women are 2-3 times more likely to die from pregnancy-related  
27 complications than White women. Doulas have been associated with improved maternal  
28 outcomes. This study aimed to 1) investigate Florida doulas' perspectives on severe maternal  
29 morbidity/mortality, related inequities, and their influence on these areas as well as 2) identify  
30 opportunities for actionable change.

31 *Methods:* This qualitative study included seven online, in-depth interviews and seven focus  
32 groups with doulas ( $n = 31$ ) in the state of Florida. Interview and focus group guides aimed to  
33 investigate how doulas perceive their role in the context of a) maternal morbidity and b) health  
34 disparities/inequities.

35 *Results:* Doulas associated maternal morbidity and health disparities with Black pregnant people,  
36 attributing racism as a major contributor. Doulas identified their role in mitigating this problem  
37 as one that involves: providing positive social surveillance and emotional support, equipping  
38 clients with access to education and resources, and championing for advocacy in healthcare  
39 settings. Actionable steps utilizing the social ecological model and reproductive justice  
40 framework are provided.

41 *Discussion and Health Equity Implications:* Doulas perceived their role as integral to mitigating  
42 maternal morbidity and maternal health disparities, particularly in the context of race. Equitable  
43 access to doulas for low-income and or minoritized populations may be one key strategy to  
44 improve maternal health equity.

## 45 **Introduction**

46 Pregnant people in the US have not reaped the benefits of the decline in worldwide  
47 maternal mortality (MM) rates.<sup>1</sup> The national MM rate rose to 32.9 deaths per 100,000 live births  
48 in 2021, compared to a rate of 23.8 in 2020.<sup>2</sup> Even after controlling for education and  
49 socioeconomic status, Black birthing people remain at the highest risk for MM and severe  
50 maternal morbidity (SMM), with a MM rate 2.6 times the rate of non-Hispanic White birthing  
51 people.<sup>2-5</sup> Comparable trends persist in Florida.<sup>6,7</sup> Many multilevel factors may explain  
52 worsening US maternal outcomes. A systematic review<sup>8</sup> on social determinants of health  
53 reported that insurance status (i.e., covered by Medicaid or not at all), income level, and lower  
54 education are associated with higher risk of maternal morbidity and mortality, in addition to  
55 demographic characteristics such as Black race and Hispanic ethnicity.

56 Doula support has been associated with improved birth outcomes including fewer  
57 cesareans, shorter labors, less birth complications, higher breastfeeding rates, higher rates of  
58 birth experience satisfaction.<sup>9-12</sup> Furthermore, the inclusion of community-based, culturally  
59 competent doula support has been associated with fewer maternal complications among  
60 marginalized women facing higher rates of MM/SMM.<sup>11-15</sup> Historically, doulas were utilized in  
61 White, middle/higher class spheres,<sup>16</sup> and low income, as well as other marginalized, populations  
62 had limited access to these services.

63 Despite popular discourse on how doula services may mitigate MM/SMM and related  
64 inequities,<sup>17-20</sup> there are limited data assessing the perspectives of doulas on their perceived role  
65 in these areas. Our study aims to 1) investigate Florida doulas' perspectives of MM/SMM and  
66 health inequities and their influence on these areas and 2) identify opportunities for actionable  
67 change in the context of maternal morbidity and maternal health disparities.

## 68 **Methods**

69 Online, in-depth interviews and focus groups were conducted with 31 doulas serving  
70 Florida families to gather rich data related to their lived experiences in the profession. Interviews  
71 and focus groups were chosen for purposes of data triangulation, as focus groups can lead to  
72 conformity of one opinion. Therefore, interviews served as a form of data checking to ensure that  
73 thematic representations were sound and not being led by focus group dynamics. Seven  
74 interviews and seven focus groups were conducted.

75 Interview and focus group guides were developed by all team members and were  
76 informed by the social ecological model (SEM; Figure 1). The SEM is based on the theory that  
77 an individual's behavior is integrated in a dynamic network of intrapersonal characteristics,  
78 interpersonal processes, institutional factors, community features and public policy.<sup>21</sup>  
79 Secondly, these guides were developed with the acknowledgement that multiple factors  
80 influence health inequities, which is one of the tenets of reproductive justice. Reproductive  
81 justice advocates for listening to birthing persons, recognizing autonomy, amplifying their voices  
82 to oppose oppression and to regain reproductive control.<sup>22,23</sup> For this study, we focused on how  
83 doulas interpret their role within the context of the SEM.

84 The study was approved as exempt by the University of South Florida and the University  
85 of Florida Institutional Review Boards. Convenience and snowball sampling practices were used  
86 to recruit doula participants. Flyers advertising the study were shared with community partners  
87 and distributed within their networks. The time interval for recruitment and data collection was  
88 approximately four months (April-July 2022). Interested participants completed an online pre-  
89 screening questionnaire which was used to determine eligibility (e.g., labor and delivery doula  
90 experience in Florida, served at least two families in the past year). After providing consent,

91 doula participants participated in an interview or focus group lasting approximately 60 minutes.  
92 Participants were compensated for their time with a \$40 digital gift card of their choice to Target,  
93 Amazon, or Wal-Mart. Interviews and focus groups were recorded via Zoom and auto-  
94 transcribed via artificial intelligence technology.

95         During interviews and focus groups, doulas were asked to provide the first word that  
96 came to mind upon hearing the phrase 'maternal morbidity,' to discuss health disparities, and  
97 were asked how they felt their skill sets may help to reduce such disparities. The subject of race  
98 or racism was not raised by the interviewer. To identify actionable steps for solutions, doulas  
99 were asked how they would address the problems they were articulating in their sessions.

100         Team members cleaned transcripts to ensure accuracy. All team members reviewed  
101 transcripts for an inductive approach toward codebook generation, following Campbell et al.'s  
102 method for coding interview data.<sup>24</sup> All team members performed open coding of all transcripts,  
103 where a close line-by-line reading of all data occurred, allowing for meaningful words, units, and  
104 contexts to emerge.<sup>25</sup> Axial coding was performed next, all team members met to combine initial  
105 open codes into broader themes, where relevant attributes could be further explored.<sup>26</sup> Themes  
106 generated reached theoretical saturation (each thematic category became operationalized with no  
107 novel information presented in subsequent interviews or focus groups), which is a significant  
108 component of qualitative research.<sup>27</sup> The first author unitized 10% of the sample of transcripts,  
109 and following Campbell et al.'s <sup>24</sup> approach for achieving intercoder agreement, the first and  
110 third authors independently coded these data.<sup>24</sup> According to Miles and Huberman's accepted  
111 levels for reliability,<sup>28</sup> the overall intercoder agreement was "very good" at a level of 92.2%. All  
112 data were then coded by the first author in NVivo, a qualitative data analysis software, to assess  
113 thematic patterns.

## 114 **Results**

### 115 *Demographics*

116 Most doulas interviewed identified as female. Most participants identified as birth, post-  
117 partum, and full spectrum doulas. Most (69%) of the doulas who participated were between 35  
118 and 54 years of age. Three-quarters (75.9%) self-reported their race as White, 17.2% self-  
119 reported their race as Black, and 6.9% self-reported their race as other. One-quarter of  
120 participants (27.6%) self-reported as Hispanic/Latina. While more than half (58.6%) of the doula  
121 participants reported an income greater than \$50,000 per year, nearly all (93.1%) reported  
122 serving families who may qualify for government assistance due to economically disadvantaged  
123 circumstances. These families may be eligible for Medicaid, WIC, or free/reduced lunch.

124 To provide depth and breadth while privileging doula responses, summaries of thematic  
125 findings, relevant SEM level, and relevant participant quotes are provided in Table 1. The names  
126 of the doulas that are quoted in Table 1 have been changed to pseudonyms to protect their  
127 privacy. In response to the first prompt, **theme one** found that doulas overwhelmingly (98%)  
128 associated *maternal morbidity* with *Black or African American pregnant people* without the  
129 interviewer prompting for racial disparities. A word cloud was created to visually represent the  
130 saturation of responses, with phrases provided most often appearing in larger font (Figure 2).

131 Frustration and sadness were expressed in the conversations surrounding this subject, and  
132 as dialogue continued, important conversations began to occur surrounding the race of doulas  
133 and their clients. A few doulas reported hearing that Black doulas preferred working with Black  
134 clients. Positive sentiment regarding this idea featured the thought that members of a community  
135 could connect with their clients, understand them, and educate them in more powerful ways.  
136 Other ideas posed by a few White doulas included the assumption that they had been hired by

137 Black clients in the past because their clients felt it gave them greater authority in the hospital  
138 setting to have a White doula present in the room.

139         These points led doulas back to conversations surrounding the importance of the doula’s  
140 role, which generated **theme two**, with 100% of doulas reporting the importance of championing  
141 for *self-advocacy* while providing *advocacy* in the context of health disparities. Doulas reflected  
142 on prior instances of systemic racism they had witnessed their clients experience and commented  
143 on having to balance their role in these situations as an advocate while still needing to ensure  
144 access (particularly in the delivery room). They discussed the importance of educating about  
145 self-advocacy above simply providing *their own* advocacy. By teaching clients how to ask their  
146 own questions, represent their interests, and convey the needs and rights of their body and their  
147 child’s, doulas reported providing a skill set that could be passed on beyond the pregnancy.  
148 However, doulas did concede that self-advocacy is a skill that takes practice - and is “easier said  
149 than done.” Notably, the importance of advocacy was highlighted around labor and delivery.  
150 Doulas did mention White doulas needing to avoid a savior mentality with Black clients. Doulas  
151 reported the hospital setting as especially challenging (both for themselves and their Black  
152 clients), as many healthcare providers may not accept their presence, leading to complexities in  
153 being able to fulfill their role to their utmost potential in these settings.

154         Considering themes one and two, doula responses revealed multiple action steps for  
155 implementation. Proposed action steps (with quotes) in Table 3 are also linked to a coordinated  
156 SEM level for further exploration. First, doulas addressed (1) their personal responsibilities in  
157 being informed on racial disparities regarding maternal health disparities. Beyond “knowing the  
158 statistics,” discussions of having a responsibility to be aware of systemic racism were addressed.  
159 Some doulas discussed the importance of (2) having doula certification programs tie more

160 systemic racism and implicit bias education into certification curricula so that this information is  
161 provided to more doula communities. Some doulas reported smaller organizations as being more  
162 inclusive of racial and ethnic diversity efforts. Therefore, some reported that larger organizations  
163 may not be as in tune with community needs or outreach, but that these organizations provide the  
164 pathway for helping more clients in-need. Many participants reflected diversity of doulas in their  
165 communities as an issue. Doulas reported a need for (3) greater public health funding to provide  
166 increased support for doula compensation and recruitment of diverse doulas to ensure clients  
167 have options. Finally, (4) some doulas recommended that the doula-provider communicative  
168 relationship be improved upon by partnering with local hospitals in substantive ways.

169         When doulas were asked about how they perceived their role in helping to reduce  
170 maternal morbidity and maternal health disparities, two final themes strongly emerged. **Theme**  
171 **three** was classified as *education and resources*, where 92% of doulas described providing  
172 access to resources, information, and education. Often, these resources were discussed as relating  
173 to childbirth, with the doula helping the birthing person prepare for what to expect during labor.  
174 Provision of resources were deemed a necessity for the postpartum period. Additionally, many  
175 doulas discussed the importance of resources specific to a client's individual needs and  
176 geographic area. A few doulas discussed the significant effort required to put together different  
177 versions of targeted resource packets for different client situations, but they did not  
178 underestimate the importance of these resources in helping their clients feel more informed.

179         Regarding *education and resources*, doulas reported that it was important that each doula  
180 was well-informed on their community and its providers and services (e.g., lactation  
181 consultation, mental health services, etc.) for a variety of client profiles (e.g., insured vs.  
182 Medicaid recipient). Therefore, a viable action step would be (5) the creation of customizable



183 resources for various client situations, complete with culturally inclusive messaging. Partnering  
184 with existing local community organizations is vital. Some doulas commented that (6) a tailoring  
185 of resources in hospital settings may be necessary not only to ensure that clients from all  
186 populations, especially marginalized groups, are being represented, but to ensure they are being  
187 *meaningfully represented*, not featured in a tokenistic way.<sup>29</sup>

188 Finally, **theme four** revealed that 82% of doulas tied the importance of their role back to  
189 the act of consistent, open communication with their clients, classified as *positive social*  
190 *surveillance*. Such encounters involved doulas making themselves available for their clients via  
191 phone, text, or email and providing greater access than a healthcare provider might be able to. By  
192 checking in, listening, and having someone check-in on them after an appointment, doulas  
193 reported that the relationship can become stronger over time. Many doulas extended this theme  
194 by noting what or was not within their scope of practice, indicating that when a client asks a  
195 medical question, they refer to the healthcare provider. Therefore, they identified their role as  
196 one with the ability to effectively monitor for social situations and inequities that other members  
197 of the healthcare team may not be privy to due to their time constraints or lack of access to the  
198 client.

199 Action steps suggested for theme four include helping clients set reminders for  
200 appointment times, providing referrals for clients who may need greater levels of assistance  
201 based on various social determinants of health (particularly focusing on partnerships with  
202 racially and ethnically based community organizations when able), and in instances where  
203 implicit bias is perceived (via the act of positive social surveillance), reminding the client of their  
204 self-advocacy skills and acting as an advocate when necessary.

205

## 206 Discussion

207 Our research found that participants overwhelmingly associated MM and SMM with  
208 Black or African American birthing people. Described racial disparities were attributed to  
209 systemic racism and implicit bias.<sup>30,31</sup> In addition to providing education, resources and  
210 emotional support, our participants discussed the importance of their role in assisting birthing  
211 persons and families by teaching self-advocacy and providing advocacy in the healthcare setting  
212 (SEM interpersonal/institutional level). Doulas assist birthing people in navigating their  
213 healthcare journeys, processing the healthcare field, overcoming obstacles, and providing  
214 valuable information. Where physicians can detect “high risk” situations in ways that doulas  
215 cannot, doulas may be able to detect “social high risk” in ways that physicians cannot, due to  
216 such acts of *positive social surveillance*. They appreciate their ability to assist birthing people  
217 with navigation of a complex healthcare delivery system that may hamper access to care (e.g.,  
218 institutionalized formalities and protocols) (SEM institutional level).

219 Doula support during pregnancy, labor, and delivery has been associated with improved  
220 outcomes among women facing disproportionately high rates of maternal morbidity<sup>32</sup>. Doula  
221 clients report higher rates of satisfaction with their birth experience and an increased belief in  
222 their own ability to influence birth outcomes through behavior change<sup>33</sup>. Our previous work  
223 demonstrates Black women who are supported by doulas during pregnancy and postpartum  
224 report enhanced communication and information sharing as well as improved emotional support  
225<sup>34</sup>. These findings align with results of the current study which indicate that doulas feel their  
226 primary role is to support birthing persons during pregnancy, birth, and postpartum (SEM  
227 interpersonal level). Conversations focused on doulas having a responsibility to their  
228 communities by being aware of systemic racism and implicit bias, utilizing culturally

229 representative educational efforts, and continuing to engage in positive surveillance by paying  
230 attention on behalf of their clients while not going outside their scope of practice.

231 Doula responses revealed multiple action steps for implementation (Table 3) including  
232 doula certification programs include more on systemic racism and implicit bias education and  
233 awareness (e.g., one suggestion for how to begin a foundation for this is Royce et al.'s Special  
234 Report on addressing implicit bias in obstetrics and gynecology education).<sup>31</sup> Regarding need for  
235 improved doula-provider communicative relationship, we suggest working toward a “cycle of  
236 doula communication,” where there is a clearly defined goals and roles for all stakeholders from  
237 the beginning to avoid what may have been a historically adversarial relationship. Health  
238 communication experts could provide training programs, scripts, and suggestions for events  
239 ranging from monthly webinars/meet-and-greets and brown bag lunches between healthcare  
240 providers and doulas.

#### 241 *Limitations*

242 We acknowledge that a limitation of our study is our sample structure. While racially  
243 representative of the larger doula profession, it is important that our future work focus on  
244 purposive sampling that explore doulas' perspectives from minoritized communities on their  
245 ability to provide support for clients, particularly in the context of medical racism. Considering  
246 our findings regarding a need for more Black doulas, it is necessary to understand how Black  
247 doulas feel they may influence MM/SMM or related disparities.

248 Additionally, an advantage that doulas may have over healthcare providers is their ability  
249 to engage with multiple facets of a patient's behavior (e.g., diet, exercise, appointment  
250 compliance, testing, etc.), referenced earlier as positive surveillance. When discussing an issue as  
251 complex as SMM, doula support for each of these areas certainly play a role and were addressed

252 in our interviews and focus groups but were beyond the scope of this study due to space  
253 limitations.

254

## 255 **Health Equity Implications**

256 Overall, our results revealed that doulas feel they serve an important role in helping to  
257 address health inequities in the perinatal period. Many of their goals entail building their  
258 professional identity around ways to dismantle these preventable occurrences for socially  
259 disadvantaged clients. Notably, our study and its findings align with the Commonwealth Fund's  
260 Advancing Health Equity Program. This study supports the foundation's evidence-based  
261 approaches for equity-centered maternity care which included the importance of doulas.<sup>20</sup>

262 Our findings and proposed action steps also have important policy implications. President  
263 Biden's 2023 budget includes \$470 million toward investments (e.g., the Healthy Start Initiative)  
264 to expand maternal health initiatives aimed at improving access to care to address the crisis of  
265 Black maternal morbidity and mortality in the United States.<sup>35</sup> Specifically, proposed calls to  
266 action from the Health Resources and Services Administration include the implementation of  
267 bias training for providers and the hiring, training, certifying, and compensation of community-  
268 based doulas in areas with higher rates of disproportionate health outcomes,<sup>36</sup> which apply to the  
269 findings and recommendations of our study. As the state of Florida ranked 36 out of 50 in 2022  
270 for the Commonwealth Fund's scorecard for healthcare, we are at a crucial juncture where  
271 support services for families must be championed to help families survive, and ultimately, have  
272 the chance to thrive.

273

274 **Acknowledgements:** We thank Victoria Evans, MA (Clinical Research Coordinator at Pediatric  
275 Research Hub, University of Florida), for her editorial contributions.

276

277 **Authorship confirmation/contribution statement: Janelle Applequist:** Methodology,  
278 Conceptualization, Software, Validation, Formal Analysis, Investigation, Data Curation, Writing  
279 – Original Draft, Writing – Review & Editing; **Roneé Wilson:** Conceptualization, Project  
280 administration, Funding acquisition, Supervision, Writing – Original Draft, Writing – Review &  
281 Editing; **Megan Perkins:** Validation, Investigation, Writing – Review & Editing; **Charlette**  
282 **Williams:** Conceptualization, Investigation, Writing – Original Draft; **Ria Joglekar:**  
283 Conceptualization, Investigation; **Richard Powis:** Conceptualization, Writing – Review &  
284 Editing; **Angela Daniel:** Conceptualization, Writing – Review & Editing; **Adetola F. Louis-**  
285 **Jacques:** Conceptualization, Project administration, Supervision, Writing – Original Draft,  
286 Writing – Review & Editing.

287

288 **Disclosure Statement:** The authors have no conflicts of interest to disclose.

289

290 **Funding Statement:** This work was supported by an internal award at the University of South  
291 Florida.

292 References:

- 293 1. Gunja MZ, Gumas ED, Williams II RD. The U.S. Maternal Mortality Crisis Continues to  
294 Worsen: An International Comparison. The Commonwealth Fund; 2022.
- 295 2. Hoyert DL. Maternal mortality rates in the United States, 2021. NCHS Health E-Stats  
296 2023, doi:<https://dx.doi.org/10.15620/cdc:124678>
- 297 3. Petersen EE, Davis NL, Goodman D, et al. Racial/ethnic disparities in pregnancy-related  
298 deaths—United States, 2007–2016. *Morbidity and Mortality Weekly Report* 2019;68(35):762
- 299 4. MacKay AP, Berg CJ, Liu X, et al. Changes in pregnancy mortality ascertainment:  
300 United States, 1999–2005. *Obstetrics & Gynecology* 2011;118(1):104-110
- 301 5. Harper MA, Espeland MA, Dugan E, et al. Racial disparity in pregnancy-related  
302 mortality following a live birth outcome. *Annals of epidemiology* 2004;14(4):274-279
- 303 6. Florida Department of Health. Community Health Assessment Resource Tool Set. 2018.  
304 Available from: <http://www.flhealthcharts.com/charts/default.aspx> [Last Accessed; May 15].
- 305 7. Hernandez L, Watson A. Assessing Prenatal Risk Screening and Severe Maternal  
306 Morbidity in Florida, 2010-2014. 2018.
- 307 8. Wang E, Glazer KB, Howell EA, et al. Social determinants of pregnancy-related  
308 mortality and morbidity in the United States: A systematic review. *Obstetrics & Gynecology*  
309 2020;135(4):896-915
- 310 9. Kozhimannil KB, Hardeman RR, Attanasio LB, et al. Doula care, birth outcomes, and  
311 costs among Medicaid beneficiaries. *Am J Public Health* 2013;103(4):e113-21,  
312 doi:10.2105/ajph.2012.301201
- 313 10. Hodnett ED, Gates S, Hofmeyr GJ, et al. Continuous support for women during  
314 childbirth. *Cochrane database of systematic reviews* 2013;7):

- 315 11. Hans SL, Edwards RC, Zhang Y. Randomized controlled trial of doula-home-visiting  
316 services: impact on maternal and infant health. *Maternal and child health journal*  
317 2018;22(1):105-113
- 318 12. Gruber KJ, Cupito SH, Dobson CF. Impact of doulas on healthy birth outcomes. *J Perinat*  
319 *Educ* 2013;22(1):49-58, doi:10.1891/1058-1243.22.1.49
- 320 13. Gordon NP, Walton D, McAdam E, et al. Effects of providing hospital-based doulas in  
321 health maintenance organization hospitals. *Obstetrics & Gynecology* 1999;93(3):422-426
- 322 14. Everson CL, Cheyney M, Bovbjerg ML. Outcomes of care for 1,892 doula-supported  
323 adolescent births in the United States: the DONA international data project, 2000 to 2013. *The*  
324 *Journal of perinatal education* 2018;27(3):135-147
- 325 15. Mosley EA, Pratt M, Besera G, et al. Evaluating birth outcomes from a community-based  
326 pregnancy support program for refugee women in Georgia. *Frontiers in Global Women's Health*  
327 2021;37
- 328 16. Lantz PM, Low LK, Varkey S, et al. Doulas as childbirth paraprofessionals: results from  
329 a national survey. *Women's Health Issues* 2005;15(3):109-116
- 330 17. Safon CB, McCloskey L, Ezekwesili C, et al. Doula Care Saves Lives, Improves Equity,  
331 And Empowers Mothers. State Medicaid Programs Should Pay For It. *Health Affairs*  
332 2021;2022(doi:10.1377/forefront.20210525.295915
- 333 18. Bridging the Gap in Maternal Care: A Doula's Role in Reducing Disparities and  
334 Improving Birth Outcomes. 2022. Available from: [https://www.thinkanthem.com/health-  
335 equity/how-doulas-reduce-maternal-care-  
336 disparities/#:~:text=Doulas%20help%20bridge%20the%20gap,doula%20have%20better%20birth  
337 h%20outcomes](https://www.thinkanthem.com/health-equity/how-doulas-reduce-maternal-care-disparities/#:~:text=Doulas%20help%20bridge%20the%20gap,doula%20have%20better%20birth%20outcomes). [Last Accessed; March 31, 2022].

- 338 19. Mather C. How Community-Based Doulas Can Help Address the Black Maternal  
339 Mortality Crisis. 2021. Available from: [http://www.ihl.org/communities/blogs/how-community-  
340 based-douglas-can-help-address-the-black-maternal-mortality-  
341 crisis#:~:text=These%20programs%20identify%20and%20train,experiences%2C%20and%20im  
342 prove%20parenting%20skills](http://www.ihl.org/communities/blogs/how-community-based-douglas-can-help-address-the-black-maternal-mortality-crisis#:~:text=These%20programs%20identify%20and%20train,experiences%2C%20and%20improve%20parenting%20skills). [Last Accessed; March 31, 2022].
- 343 20. Zephyrin L, Seervai S, Lewis C, et al. Community-Based Models to Improve Maternal  
344 Health Outcomes and Promote Health Equity. 2021. Available from:  
345 [https://www.commonwealthfund.org/publications/issue-briefs/2021/mar/community-models-  
346 improve-maternal-outcomes-  
347 equity#:~:text=Community%2Dbased%20douglas%20and%20nurse,during%20their%20own%20  
348 birth%20process](https://www.commonwealthfund.org/publications/issue-briefs/2021/mar/community-models-improve-maternal-outcomes-equity#:~:text=Community%2Dbased%20douglas%20and%20nurse,during%20their%20own%20birth%20process). [Last Accessed; March 31, 2022].
- 349 21. Elder JP, Lytle L, Sallis JF, et al. A description of the social–ecological framework used  
350 in the trial of activity for adolescent girls (TAAG). *Health education research* 2007;22(2):155-  
351 165
- 352 22. Zhuang J, Goldbort J, Bogdan-Lovis E, et al. Black mothers’ birthing experiences: in  
353 search of birthing justice. *Ethnicity & Health* 2022;1-15
- 354 23. Ross LJ. Reproductive justice as intersectional feminist activism. *Souls* 2017;19(3):286-  
355 314
- 356 24. Campbell JL, Quincy C, Osserman J, et al. Coding in-depth semistructured interviews:  
357 Problems of unitization and intercoder reliability and agreement. *Sociological methods &  
358 research* 2013;42(3):294-320
- 359 25. Bogdan R, Taylor SJ. *Introduction to qualitative research methods: A phenomenological  
360 approach to the social sciences*. Wiley New York: 1975.



- 361 26. Parker J, Ang L, Koslow S. The creative search for an insight in account planning: An  
362 absorptive capacity approach. *Journal of Advertising* 2018;47(3):237-254
- 363 27. Morse JM. The Significance of Saturation. *Qualitative Health Research* 1995;5(2):147-  
364 149, doi:10.1177/104973239500500201
- 365 28. Miles MB, Huberman AM. Drawing valid meaning from qualitative data: Toward a  
366 shared craft. *Educational researcher* 1984;13(5):20-30
- 367 29. Dow BJ, Wood JT, Wood JT. *The SAGE handbook of gender and communication*. Sage:  
368 2006.
- 369 30. Greenwald AG, Banaji MR. Implicit social cognition: attitudes, self-esteem, and  
370 stereotypes. *Psychological review* 1995;102(1):4
- 371 31. Royce CS, Morgan HK, Baecher-Lind L, et al. THE TIME IS NOW: ADDRESSING  
372 IMPLICIT BIAS IN OBSTETRICS AND GYNECOLOGY EDUCATION. *American Journal of*  
373 *Obstetrics and Gynecology* 2022;
- 374 32. Kozhimannil KB, Hardeman RR, Attanasio LB, et al. Doula care, birth outcomes, and  
375 costs among Medicaid beneficiaries. *American journal of public health* 2013;103(4):e113-e121
- 376 33. Gruber KJ, Cupito SH, Dobson CF. Impact of doulas on healthy birth outcomes. *The*  
377 *Journal of perinatal education* 2013;22(1):49-58
- 378 34. Deubel TF, Miller EM, Hernandez I, et al. Perceptions and practices of infant feeding  
379 among African American women. *Ecology of food and nutrition* 2019;58(4):301-316
- 380 35. U.S. Department of Health and Human Services. Health Resources and Services  
381 Administration Announces Availability of New Funding to Support Community-Based Doulas.  
382 2022. Available from: <https://www.hhs.gov/about/news/2022/04/01/hrsa-announced-the->

383 [availability-of-4-million-for-hiring-training-certifying-compensating-community-based-](#)  
384 [douglas.html](#) [Last Accessed; January 29].

385 36. The White House. Fact Sheet: The President's Budget for Fiscal Year 2023. Available  
386 from: [https://www.whitehouse.gov/omb/briefing-room/2022/03/28/fact-sheet-the-presidents-](https://www.whitehouse.gov/omb/briefing-room/2022/03/28/fact-sheet-the-presidents-budget-for-fiscal-year-2023/)  
387 [budget-for-fiscal-year-2023/](#) [Last Accessed; January 29].

388  
389

390 **Figure 1** Conceptual Model - Social Ecological Model (SEM)

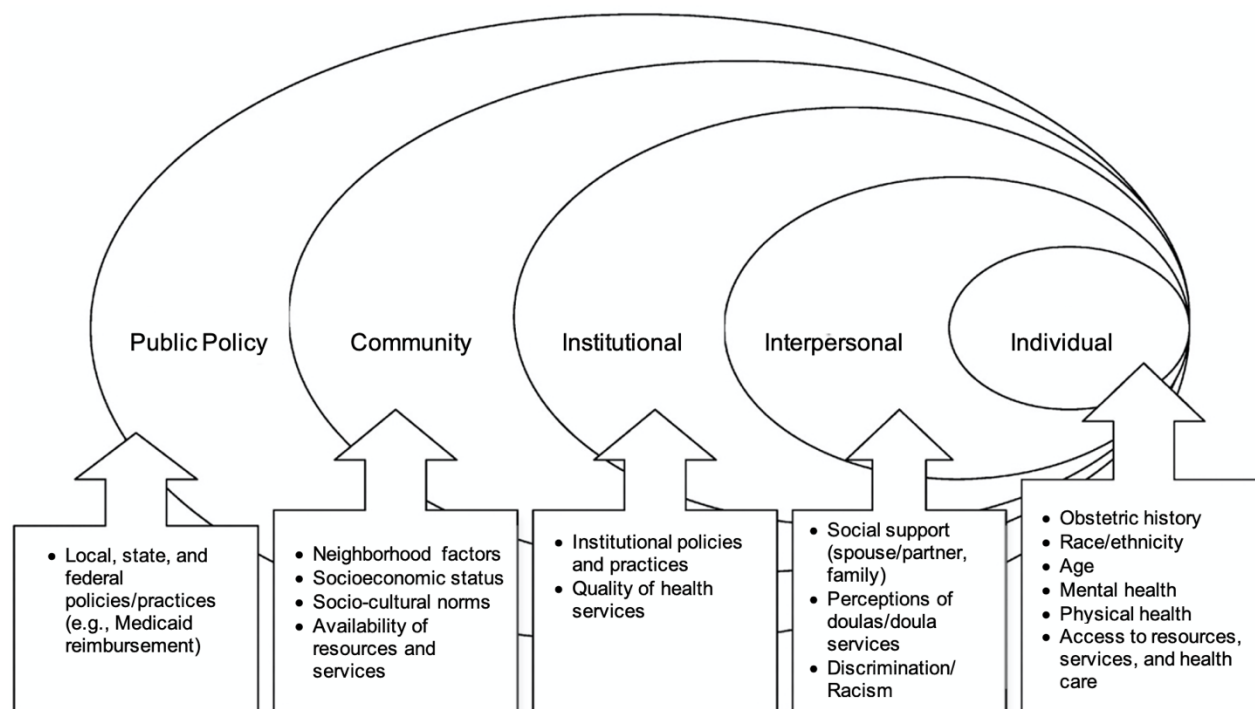

391 A conceptual model of our study, based on the social ecological model, which considers how a  
392 variety of factors influence a birthing person's pregnancy journey.  
393

394 **Figure 2** Word Cloud Representation  
395

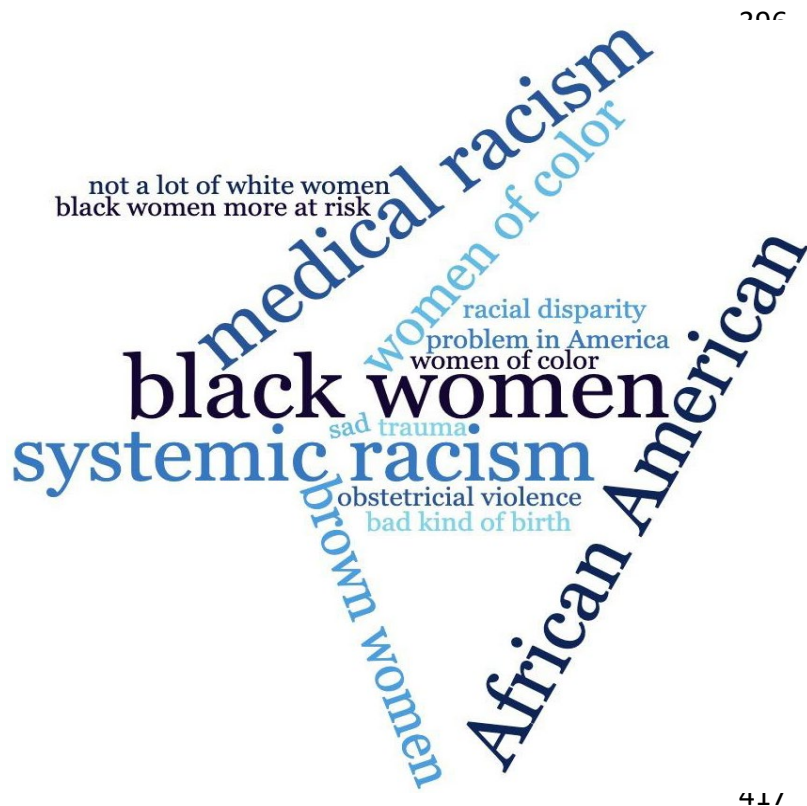

396

417

418  
419 Doula Responses to "When you hear the phrase 'maternal morbidity,' what is the first word that  
420 comes to mind?"  
421  
422  
423  
424  
425  
426  
427  
428  
429  
430  
431  
432  
433  
434  
435  
436  
437  
438  
439

**Table 1.** Thematic Findings, Summaries, and Quotes

| Theme                                                                                                                            | Brief Summary                                                                                                                                                                                                                                                                                                                                                                                                                     | Relevant Social Ecological Model (SEM) Level(s)                                                                                                     | Relevant Quotes                                                                                                                                                                                                                                                                                                                                                                                                                                                                                                                                                                                                                                                                                                                                                                                                                                                                                                                                                                                                                                                                                                                                                                                                                                                                                                                                                                                                                                                                                                                                                                                                                                                                         |
|----------------------------------------------------------------------------------------------------------------------------------|-----------------------------------------------------------------------------------------------------------------------------------------------------------------------------------------------------------------------------------------------------------------------------------------------------------------------------------------------------------------------------------------------------------------------------------|-----------------------------------------------------------------------------------------------------------------------------------------------------|-----------------------------------------------------------------------------------------------------------------------------------------------------------------------------------------------------------------------------------------------------------------------------------------------------------------------------------------------------------------------------------------------------------------------------------------------------------------------------------------------------------------------------------------------------------------------------------------------------------------------------------------------------------------------------------------------------------------------------------------------------------------------------------------------------------------------------------------------------------------------------------------------------------------------------------------------------------------------------------------------------------------------------------------------------------------------------------------------------------------------------------------------------------------------------------------------------------------------------------------------------------------------------------------------------------------------------------------------------------------------------------------------------------------------------------------------------------------------------------------------------------------------------------------------------------------------------------------------------------------------------------------------------------------------------------------|
| (1) Doulas identified significant racial disparities for Black women when it comes to maternal morbidity and health disparities. | The most-often reported phrases that first to came to mind when asked about “maternal morbidity” were “Black women” and “African American.” White doulas provided multiple accounts of witnessing implicit bias (especially in hospital settings), which they identified as being the primary reasons that health disparities and maternal morbidity are able to continue to affect Black women at disproportionately high rates. | <ul style="list-style-type: none"> <li>• Public policy</li> <li>• Community</li> <li>• Institutional</li> <li>• Interpersonal Individual</li> </ul> | <p><i>“I think something very important for us, as doulas is...the unconditional support that we provide to women in many aspects of their lives, that they have not received, So when we're talking about morbidity and we both [both participants] said, at the same time, “African American women,” another word that comes with that immediately is racism, is higher stress levels, is discrimination. In my case, I can see clearly a stigma. You know, all the things that African American women go through when they see a medical provider, that is never the same as the things White women go through when you see a medical provider.” – Joy</i></p> <p><i>“People don’t even listen, you know, and people don’t listen to marginalized people when they express concern or anything like that. I’ve had my own situations with, you know, actually well-off Black clients that I have just watched these crazy scenarios where my client is getting questioned about what she's saying, stating that her epidural’s not working properly, and instead of the anesthesiologist like rushing to the room to give extra doses, she’s getting questioned by the nurse, like as if she's not sure.” – Sarah</i></p> <p><i>“There are still some medical schools that teach that there are differences in pain tolerance based on skin color and that’s not fully out of the curriculum yet, and so you can imagine if that’s still in the curriculum and how much more it was in their curriculum 10 and 15 years ago. And we get these experienced OB-GYNs or experienced anesthesiologists. What are they really...what are they <b>really</b> thinking?” – Samantha</i></p> |
| <i>sub-theme:</i> Doulas reflected on how their own race impacted the doula-client relationship,                                 | <i>sub-theme:</i> White and Hispanic doulas reported anecdotal evidence (hearing from other doulas) regarding Black doulas’ wanting to exclusively work with                                                                                                                                                                                                                                                                      |                                                                                                                                                     | <i>“Well, I think it's important that, as doulas, we support the efforts that are already going on to have more Black doulas and Black midwives and invest in the organizations that are already providing that type of work and offering that type of training, because ultimately that is one of the key pieces because the population that is affected disproportionately are Black women, so to have culturally responsive providers will help bridge the gap between a lot of those problems that we do see as far as accessing prenatal care,</i>                                                                                                                                                                                                                                                                                                                                                                                                                                                                                                                                                                                                                                                                                                                                                                                                                                                                                                                                                                                                                                                                                                                                 |

|                                                                                                                                                                                           |                                                                                                                                                                                                                                                                                                                                                                                                                                                                   |                                                                   |                                                                                                                                                                                                                                                                                                                                                                                                                                                                                                                                                                                                                                                                                                                                                                                                                                                                                                                                                                                                                                                                                                                                                                                                                                |
|-------------------------------------------------------------------------------------------------------------------------------------------------------------------------------------------|-------------------------------------------------------------------------------------------------------------------------------------------------------------------------------------------------------------------------------------------------------------------------------------------------------------------------------------------------------------------------------------------------------------------------------------------------------------------|-------------------------------------------------------------------|--------------------------------------------------------------------------------------------------------------------------------------------------------------------------------------------------------------------------------------------------------------------------------------------------------------------------------------------------------------------------------------------------------------------------------------------------------------------------------------------------------------------------------------------------------------------------------------------------------------------------------------------------------------------------------------------------------------------------------------------------------------------------------------------------------------------------------------------------------------------------------------------------------------------------------------------------------------------------------------------------------------------------------------------------------------------------------------------------------------------------------------------------------------------------------------------------------------------------------|
| <p>and ultimately, the client's experience throughout the birthing journey</p>                                                                                                            | <p>Black clients and provided pros and cons (pros: Black doulas want to help their community and should be able to do so, clients may feel more understood and comfortable; cons: there are not enough Black doulas available to serve in the area); White doulas reported the assumption that they are hired by minority clients because their presence provides more authority for their clients to help combat implicit bias of obstetrician-gynecologists</p> |                                                                   | <p><i>which then also has a large effect on things like maternal and infant morbidities, so if we can kind of bridge the gap by having more providers, then more pregnant people who need the access are going to get the access.” – Katy</i></p> <p><i>“As much as I hate to say this, I am very privileged. I am hired as a White woman by minorities constantly because they trust that providers will listen to me. I hate that it's like that, of course. It's kind of bittersweet. Like they trust me, but the fact that they're in that position, really it just boils my blood.” – Audre</i></p>                                                                                                                                                                                                                                                                                                                                                                                                                                                                                                                                                                                                                       |
| <p>(2) Doulas reported that they help to reduce maternal morbidity and health disparities for Black birthing people by promoting self-advocacy and providing advocacy when necessary.</p> | <p>In the context of implicit bias, doulas teased out the important nature of Black birthing people 1) learning more about how to define their agency throughout their birthing journey (e.g., asking questions, convey their needs), but also 2) knowing when they (the doula) may need to step in in order to advocate for the client in situations where they are witnessing implicit</p>                                                                      | <ul style="list-style-type: none"> <li>• Interpersonal</li> </ul> | <p><i>“I'm going to go back to mostly listening and encouraging people to advocate for themselves. I feel like a lot of this falls short and the fact that We don't listen to women as a part of a health care system. We don't listen to BIPOC women, even more, and having a doula helps to have somebody extra that can hear you and be in that space and reinforce the confidence that you need to have in ourselves to advocate. And we've watched this happen. This baby is now three months old and I had a client who was seeing a White old school ED doctor here and has hypertension in her family, was induced because of preeclampsia, birth went beautifully, but blood pressure was terrifying. And she went to him and she spent the entire time lecturing her on how she was taking her blood pressure and then we did postpartum visit and we talked about her blood pressure and things she was looking for...180/130 was her blood pressure and she called her MFM in the ER to address and she called another provider in the office and that provider was the one who listened to her. And she was on magnesium for 4 days in the hospital while they addressed her blood pressure versus before</i></p> |

bias occur, but it is important to avoid a White savior mentality in these situations.

*they were just giving her the same medication and telling her to give it more time, to give it more time. They were not listening to her. She could've had a stroke, she could've lost her kids, she could've died. And so, being a listening ear. I can't call the doctor. The amount of times I wanted to do that? But listening and encouraging. And letting them know that it's okay to ask for somebody else." – Layla*

*"I want to empower my clients to be able to advocate for themselves, but there have been times that I have had to step in and say something when my client has repeatedly said they don't want something or they refuse or they have not given consent for a cervical check, for example, and the OB-GYN did it anyways and you know that is not okay. And so I will say something and it's just frustrating to watch and be a part of it. So yes definitely I feel like there's been situations where I thought, "what if I had not been there?" And so many women are not being, you know, having that support or having you know that, whether they can't afford it, whether they're unaware of what a doula is, but I would say the majority who need it can't afford the support." - Joy*

*"I think that for the most part, Black and brown people want support from Black and brown people, right, unless it's a situation where they feel like, if I have a White doula in the room that will that will help protect me, you know, I think, for the most part it's like it's tricky like we have some very powerful advocates in LA and you know, some of them are my friends and they're very clear about us staying in our lane, you know. I think about, you know, myself and my White doula friends, it's like our knee jerk reaction is to like go save people and, like show up in these situations, and you know all this kind of stuff and you know our close friends that are you know BIPOC doulas are just like "whoa, whoa, whoa, like stay in your lane, lady, you know that is not...you know, unless someone specifically, like they are aware that you are a White person and that they're requesting your support, like refer them..."you know. So most of my experience as far as some of the horror stories that have happened are via my friends that support primarily black and brown clients. You know, so my personal experience with that is less. But the stories that I've heard are toe curling I mean just some of the worst stuff." - Jane*

|                                                                                                                                                                                                                             |                                                                                                                                                                                                                                                                                                                                                                                                                                                                                                                                                                |                                                                                         |                                                                                                                                                                                                                                                                                                                                                                                                                                                                                                                                                                                                                                                                                                                                                                                                                                                                                                                                                                                                                                                                                                                                                                                                                                               |
|-----------------------------------------------------------------------------------------------------------------------------------------------------------------------------------------------------------------------------|----------------------------------------------------------------------------------------------------------------------------------------------------------------------------------------------------------------------------------------------------------------------------------------------------------------------------------------------------------------------------------------------------------------------------------------------------------------------------------------------------------------------------------------------------------------|-----------------------------------------------------------------------------------------|-----------------------------------------------------------------------------------------------------------------------------------------------------------------------------------------------------------------------------------------------------------------------------------------------------------------------------------------------------------------------------------------------------------------------------------------------------------------------------------------------------------------------------------------------------------------------------------------------------------------------------------------------------------------------------------------------------------------------------------------------------------------------------------------------------------------------------------------------------------------------------------------------------------------------------------------------------------------------------------------------------------------------------------------------------------------------------------------------------------------------------------------------------------------------------------------------------------------------------------------------|
| <p>(3) Doulas perceive their role in helping to reduce maternal morbidity and health disparities, specifically in the context of obstetric implicit bias, by providing access to resources, information, and education.</p> | <p>Providing childbirth education, answering questions, and supplementing conversations with research-based information was discussed as one of the doulas' most significantly-perceived roles in helping to mitigate racial disparities in health disparities. The importance of providing information and resources tailored to one's journey was an important point of conversation for doulas, including the acknowledgment to clients that they may face implicit bias during their labor and having honest conversations about how to navigate that.</p> | <ul style="list-style-type: none"> <li>• Community</li> <li>• Interpersonal</li> </ul>  | <p><i>“Again, education. Acknowledging the elephant in the room. Teaching clients of different racial and ethnic backgrounds like “we acknowledge that there is racism in the health system.” And sometimes you are going to have to speak louder than you would have to otherwise and it sucks. I especially see this with breastfeeding. When I did prenatal breastfeeding groups, I would tell them that the squeaky wheel gets the grease, so you might need to say “I need the lactation consultant.” Say it. Tell them. Ask them to document it in your chart. Because otherwise, you know, it's easy to feel shut down and get overlooked.” – Charlotte</i></p> <p><i>“Being treated poorly as a patient is not their only option and part of the doula's role is to provide resources. That's a huge part of what doulas do – provide resources to their client. So it's important that we're educated on our communities and that we're not going in blind and that we have lists on hand of alternate providers and all types of resources for our clients. So being able to be there for the client and not let them be left alone thinking that they have no other choice or no other option, I think, is huge.” – Chanel</i></p> |
| <p>(4) Doulas engage in positive social surveillance – the act of consistent, open communication, to help keep a</p>                                                                                                        | <p>Checking in on clients via texts, phone calls, and emails provides an additional layer of support that birthing persons may not receive from the healthcare system otherwise. Scope</p>                                                                                                                                                                                                                                                                                                                                                                     | <ul style="list-style-type: none"> <li>• Interpersonal</li> <li>• Individual</li> </ul> | <p><i>“I mean, I think, for the most part it's like, just, it's some of it is us paying attention. You know, having open communication, open and like easy communication with our clients, so someone texted me and they were saying, like you know “I've gone home that from the birth, things are okay, whatever,” and you know “I just had this happen,” and she's saying to me like “I'm so dizzy like I feel so dizzy and I have the worst headache.” It was one of those situations where it's like “You also had some high blood</i></p>                                                                                                                                                                                                                                                                                                                                                                                                                                                                                                                                                                                                                                                                                               |



positive, watchful eye on their clients in order to combat implicit bias in the medical setting when possible.

of practice is important to remember here, as doulas reported sending clients back to their healthcare providers when medical questions were posed, but the importance of establishing a sense of support for the birthing person throughout their journey is the focus.

*pressure during your labor that sounds like eclampsia please go to the emergency room immediately.” Whereas her partner may have said that or whatever someone else might have told her, but like in other people's situations they might just think that that's part of postpartum and being exhausted and being a new mom or just having the hours of labor or whatever, and the next thing they know they're stroking out because they can't get their doctor. You know it's like they just don't know, they just don't know. You don't know what you don't know. So I think, just having someone that's like looking out for you, that's paying attention, that's taking their feedback and complaints and stuff like that seriously.” – Jane*

*“I'm thinking about, for example, a client that I had once that she was in a rehab center because she was using substances during pregnancy. And she was in jail and then was sent to this place and she was pretty much dismissed every time she was going to her medical appointments with concerns because she's African American, because she was in jail, and plus she's in rehab, so just this stigma with all of that combined and just these like, “wow but you were using drugs during pregnancy really, so now you're telling me that your feet are swollen?”, for example, comments, so just, I think... What I did specifically with this mother when she came to classes, when she was present was I allowed her to talk about her trauma, why she was going through everything she was going through, I not only got the concept of you are a drug user that is pregnant that was in jail, but allowed her to express her trauma and go from there and communicate with her nurse in the medical setting so she could receive services, you know, because sometimes she was calling... we're talking about she's in this house in rehab so they don't get phone calls every day so when I would see her, I would write down all of her concerns and sometimes I would call her nurse directly and say “okay, we are arranging transportation or her case manager is arranging transportation for her to go to her medical appointment tomorrow. All of this is happening, she won't have time to call you again, I'm calling you on behalf of my client because of so-on, so-on, so-on, so-on,” to see if they pay more attention to their needs... it's not only the fact that there are more morbidities and they have more issues, but in this case was also the stigma of what's happening with her life, you know?” - Joy*

441 **Table 3.** Themes and Proposed Action Items for Utilizing Doulas to Mitigate Maternal Morbidity and Health Disparities

| Theme                                                                                                                                   | Relevant SEM Level(s)                                                                                                                                      | Actionable Steps                                                                                                                                                                                                                                                                                   | Actionable Sub-Steps                                                                                                                                                                                                                                                                                                                                                                                                                                                                                                         | Relevant Quote(s)                                                                                                                                                                                                                                                                                                                                                                                                                                                                                                                                                                                                                                                                                                                                                                                                                                                                                                                                                                                                                                                                                                                                                                                                                                                                                                                                                                                                                                                                                                                                                                                                                                                                                                                                                                                                                                                                                                                                                                                                                                                                    |
|-----------------------------------------------------------------------------------------------------------------------------------------|------------------------------------------------------------------------------------------------------------------------------------------------------------|----------------------------------------------------------------------------------------------------------------------------------------------------------------------------------------------------------------------------------------------------------------------------------------------------|------------------------------------------------------------------------------------------------------------------------------------------------------------------------------------------------------------------------------------------------------------------------------------------------------------------------------------------------------------------------------------------------------------------------------------------------------------------------------------------------------------------------------|--------------------------------------------------------------------------------------------------------------------------------------------------------------------------------------------------------------------------------------------------------------------------------------------------------------------------------------------------------------------------------------------------------------------------------------------------------------------------------------------------------------------------------------------------------------------------------------------------------------------------------------------------------------------------------------------------------------------------------------------------------------------------------------------------------------------------------------------------------------------------------------------------------------------------------------------------------------------------------------------------------------------------------------------------------------------------------------------------------------------------------------------------------------------------------------------------------------------------------------------------------------------------------------------------------------------------------------------------------------------------------------------------------------------------------------------------------------------------------------------------------------------------------------------------------------------------------------------------------------------------------------------------------------------------------------------------------------------------------------------------------------------------------------------------------------------------------------------------------------------------------------------------------------------------------------------------------------------------------------------------------------------------------------------------------------------------------------|
| <p>(1) Doulas identified significant racial disparities for Black women when it comes to maternal morbidity and health disparities.</p> | <ul style="list-style-type: none"> <li>• Public policy</li> <li>• Community</li> <li>• Institutional</li> <li>• Interpersonal</li> </ul> <p>Individual</p> | <p>a) doulas have a personal and professional responsibility to be educated on obstetric implicit bias</p> <p>b) national doula certification programs should more strategically integrate implicit bias into their curriculum in an effort to get this information dispersed into communities</p> | <p>1) Ensure that curriculum components are developed based on prior work of scientists and birthing people from historically marginalized groups – and that any courses provided are taught by these individuals as well, to ensure an informed, patient-centered design in all phases of implementation</p> <p>2) Proper message testing of all materials will be necessary (with member-checking and oversight by a health communication scholar) to ensure that the education being provided to doulas is culturally</p> | <p><i>“We make sure we're creating a doula community that is culturally and linguistically, racially, ethnically, and religiously representative of birthing people. So making sure that we're doing that and, in the event that like Angela and I are both White we, you know, we can't change that. So making sure that Angela and I have done the work to remove our own biases to make sure that we're not bringing sort of that layered racism into the room, implicit bias and things like that, if we're working with clients that are anything but like White, English-speaking people. And so I think that's really important for doula to do that because we're consistent support, we've been with you prenatally, were often with you during Labor, before you go to the hospital, we're there with you through triage, there through leave for nurses changing and doctor shifts changing, all that. We're that consistent person, so making sure that we've done all that we can to be the best consistent...yeah the best person there for you during that time and acknowledging all of that.” – Samantha</i></p> <p><i>“...just insurances here in Florida, or probably nationwide, a very limited number of organizations are considered as qualified doulas, so if you haven't gone through one of the five major doula organizations, it doesn't matter, you're not going to contract with any insurances, because you didn't go through DONA, or you didn't go through CAPP, or you didn't go through ICEA, it's basically like 3-5 major ones. And the issue with that is that those organizations have their own systemic issues and problems as far as being inclusive, as far as being anti-racist, as far as being anti-trans, there's just a lot of issues in that respect. Also they are quite expensive. If you've gone through a smaller training organization that is maybe led by Black women or has a focus on trans or LGBT clients, then you may be getting the educational piece and the information you need to appropriately serve the</i></p> |

|                                                                                                                                                                                    |                                                                   |                                                                                                                                                                                                                                                                                                                                                                                  |                                                                                                                                                                                                                                                                                                                              |                                                                                                                                                                                                                                                                                                                                                                                                                                                                                                                                                                                                                                                                                                                                                                                                                                                                                                                                                                                                                                                                                                                                                                                                                                                                                                                                                                                                                                                                                                                                                                                                                                                                                                                                                                                                                                                                            |
|------------------------------------------------------------------------------------------------------------------------------------------------------------------------------------|-------------------------------------------------------------------|----------------------------------------------------------------------------------------------------------------------------------------------------------------------------------------------------------------------------------------------------------------------------------------------------------------------------------------------------------------------------------|------------------------------------------------------------------------------------------------------------------------------------------------------------------------------------------------------------------------------------------------------------------------------------------------------------------------------|----------------------------------------------------------------------------------------------------------------------------------------------------------------------------------------------------------------------------------------------------------------------------------------------------------------------------------------------------------------------------------------------------------------------------------------------------------------------------------------------------------------------------------------------------------------------------------------------------------------------------------------------------------------------------------------------------------------------------------------------------------------------------------------------------------------------------------------------------------------------------------------------------------------------------------------------------------------------------------------------------------------------------------------------------------------------------------------------------------------------------------------------------------------------------------------------------------------------------------------------------------------------------------------------------------------------------------------------------------------------------------------------------------------------------------------------------------------------------------------------------------------------------------------------------------------------------------------------------------------------------------------------------------------------------------------------------------------------------------------------------------------------------------------------------------------------------------------------------------------------------|
|                                                                                                                                                                                    |                                                                   |                                                                                                                                                                                                                                                                                                                                                                                  | relevant, sensitive, and socially responsible                                                                                                                                                                                                                                                                                | <i>community you want to serve, but then you're lacking the access piece to where people can actually access you because you can't qualify to be a Medicaid provider, and so it severely limits the diversity of doulas that are available on Medicaid, which is like the biggest problem because you have that diversity with your Medicaid clients but you don't have the diversity with doulas, so that is a major barrier between doulas and the Medicaid system... ” – Katy</i>                                                                                                                                                                                                                                                                                                                                                                                                                                                                                                                                                                                                                                                                                                                                                                                                                                                                                                                                                                                                                                                                                                                                                                                                                                                                                                                                                                                       |
| (2) Doulas reported that they help to reduce maternal morbidity and health disparities for Black birthing people by promoting self-advocacy and providing advocacy when necessary. | <ul style="list-style-type: none"> <li>• Interpersonal</li> </ul> | <p>a) greater public health funding is necessary to bolster the doula profession and to help diversify doulas for various racial and ethnic communities</p> <p>b) local hospital partnerships should be established to begin working toward a “cycle of birthing communication ” aimed at breaking down any barriers that may exist between healthcare providers and doulas,</p> | <p>1) Roundtable discussions between healthcare providers (nurses, OB-GYNs and doulas) to discuss their roles, with emphasis on shared goal of healthy birthing process</p> <p>2) Having an expert in organizational communication present may be helpful to ensure that all conversations are constructive and positive</p> | <i>“I would say the best scenario that I’ve seen tried to have a positive note here is that for quite a few years at [redacted]. There was a woman named [redacted], who was the head of DONA at one time, and she had a relationship with [redacted] and created like a [redacted] sort of. She was trying to create this bridge between doulas and like labor and delivery. And so, as a result, there would be like annual events where they would invite all these doulas and all these OBs and nurses and stuff like that, so it was like networking and then we’ve had these...Some of us we would get asked to these regular roundtable meetings where you know nurses would complain, would tell us like what they hated about doulas quite frankly, like, the shitty things that had happened, or like things that were upsetting to them, or like where we were stepping on toes and stuff like that, and then we could say “this is what I have an issue with,” like “the fact that I couldn't get into the OR,” or whatever, so there was an actual space for this. There was a few years there were there was a very open dialogue between doulas and labor delivery and it totally changed the tone of [redacted], it became my favorite place to go, like I could wear my advisory board badge and like all that kind of stuff you know. Unfortunately, it like unraveled at some point, there was some issue or whatever between [redacted] and [redacted] or one of the OBs I don't know I don't know what happened, I just know that it got disbanded but there was a while that having that open dialogue was a huge very positive thing you know and they did something similar at [redacted] but it wasn't quite nearly as vigorous or any of that kind of thing. But it was still created by like one of the directors of nursing and stuff like</i> |

|                                                                                                                                                              |                                                                                        |                                                                                                                                                                                                                                                     |                                                                                                                                                                                                                                                                                                                                                                                                                                                                                                                                                                            |                                                                                                                                                                                                                                                                                                                                                                                                                                                                                                                                                                                                                                                                                                                                                                                                                                                                                                                                                                                                                                                                                                                                                                                                                                                                                                                                                                                                   |
|--------------------------------------------------------------------------------------------------------------------------------------------------------------|----------------------------------------------------------------------------------------|-----------------------------------------------------------------------------------------------------------------------------------------------------------------------------------------------------------------------------------------------------|----------------------------------------------------------------------------------------------------------------------------------------------------------------------------------------------------------------------------------------------------------------------------------------------------------------------------------------------------------------------------------------------------------------------------------------------------------------------------------------------------------------------------------------------------------------------------|---------------------------------------------------------------------------------------------------------------------------------------------------------------------------------------------------------------------------------------------------------------------------------------------------------------------------------------------------------------------------------------------------------------------------------------------------------------------------------------------------------------------------------------------------------------------------------------------------------------------------------------------------------------------------------------------------------------------------------------------------------------------------------------------------------------------------------------------------------------------------------------------------------------------------------------------------------------------------------------------------------------------------------------------------------------------------------------------------------------------------------------------------------------------------------------------------------------------------------------------------------------------------------------------------------------------------------------------------------------------------------------------------|
|                                                                                                                                                              |                                                                                        | particularly in the hospital setting                                                                                                                                                                                                                |                                                                                                                                                                                                                                                                                                                                                                                                                                                                                                                                                                            | <i>that, and so you know similar they would like invite like 16 of us to come and be in conversation, and they would tell us about things that they were trying to do on their end and you know request things of us and like stuff like that so...that was a big deal. That was a big deal. That is something that I can see really making a difference here in Florida.” - Jane</i>                                                                                                                                                                                                                                                                                                                                                                                                                                                                                                                                                                                                                                                                                                                                                                                                                                                                                                                                                                                                             |
| (3) Doulas perceive their role in helping to reduce maternal morbidity and health disparities, by providing access to resources, information, and education. | <ul style="list-style-type: none"> <li>• Community</li> <li>• Interpersonal</li> </ul> | <p>a) doulas should provide tailored resources for their clients, based on demographic information, familial structure, and geographic location</p> <p>b) partnering with hospitals with ensure that messaging is representative is recommended</p> | <p>1) Resources may include:</p> <ul style="list-style-type: none"> <li>o local providers</li> <li>o birth plan worksheet</li> <li>o lactation support groups</li> <li>o screening tools for mental health</li> <li>o local parenting classes</li> <li>o list of pediatricians</li> <li>o affirmation</li> <li>o “when to call your doula”</li> </ul> <p>2) Keep in mind when working with messaging that representation matters – but authentic representation is key; therefore, message testing is important to ensure patients of all backgrounds feel represented</p> | <p><i>“...the types of materials or in the materials that you see provided, for example, in the hospital setting ....it’s just the issue of representation.... that’s really important. Yes, it shouldn’t always be, for example, a White mom. It’s really important that Black mothers can see Black mothers in some of these materials. Even just the standard medical textbooks and posters that you see in your provider’s office – it’s always going to be a White baby, even if it’s animated. Whenever you see a poster of a baby and a pelvis it’s going to be a White baby there. It is. I have never seen a baby of color on a poster in a doctor’s office, ever. Oh yeah, there’s a huge issue of representation.” - Chanel</i></p> <p><i>“So that’s something that I had a conversation with my trainer about (my training for my certification). That’s something that they are working on because their standard packages that they have and those paper resources – they’re pretty basic as far as “mom and her partner” and the partner is always “dad.” You know, “the dad’s handbook” or “the dad’s car” – so, stuff like that, so yeah that’s something that I can tweak to cater to my client. I’m not going to hand them a packet that says “my partner can do this during labor; my partner can help me do this postpartum....” when they don’t have one.” – Chanel</i></p> |

|                                                                                                                                                        |                                                                                         |                                                                                                                                                        |                                                                                                                                                                                                                                                                                                                                                                                                                                                     |                                                                                                                                                                                                                                                                                                                                                                                                                                                                                                                                                                                                                                                                                                                                                                                                                                                                                                                                                                                                                                                                                                                                                                                                                                                                                                                                                                                                                                                                                                                                                                                                                                                                                                                                                                                                                                                                                                                                                                        |
|--------------------------------------------------------------------------------------------------------------------------------------------------------|-----------------------------------------------------------------------------------------|--------------------------------------------------------------------------------------------------------------------------------------------------------|-----------------------------------------------------------------------------------------------------------------------------------------------------------------------------------------------------------------------------------------------------------------------------------------------------------------------------------------------------------------------------------------------------------------------------------------------------|------------------------------------------------------------------------------------------------------------------------------------------------------------------------------------------------------------------------------------------------------------------------------------------------------------------------------------------------------------------------------------------------------------------------------------------------------------------------------------------------------------------------------------------------------------------------------------------------------------------------------------------------------------------------------------------------------------------------------------------------------------------------------------------------------------------------------------------------------------------------------------------------------------------------------------------------------------------------------------------------------------------------------------------------------------------------------------------------------------------------------------------------------------------------------------------------------------------------------------------------------------------------------------------------------------------------------------------------------------------------------------------------------------------------------------------------------------------------------------------------------------------------------------------------------------------------------------------------------------------------------------------------------------------------------------------------------------------------------------------------------------------------------------------------------------------------------------------------------------------------------------------------------------------------------------------------------------------------|
|                                                                                                                                                        |                                                                                         |                                                                                                                                                        | 3) every family structure looks different – provide different resources for each scenario                                                                                                                                                                                                                                                                                                                                                           |                                                                                                                                                                                                                                                                                                                                                                                                                                                                                                                                                                                                                                                                                                                                                                                                                                                                                                                                                                                                                                                                                                                                                                                                                                                                                                                                                                                                                                                                                                                                                                                                                                                                                                                                                                                                                                                                                                                                                                        |
| (4) Doulas engage in positive social surveillance – the act of consistent, open communication, to help keep a positive, watchful eye on their clients. | <ul style="list-style-type: none"> <li>• Interpersonal</li> <li>• Individual</li> </ul> | a) check-in with clients on a regular basis<br>b) keep scope of practice in mind (referring clients back to healthcare providers for medical concerns) | 1) Most preferred forms of communication according to doulas: <ul style="list-style-type: none"> <li>o text</li> <li>o email</li> <li>o face-to-face</li> </ul> 2) Check-in with clients after their appointments to see how things went and cultivate a positive doula-client relationship built on trust 3) Use positive social surveillance as a way to champion self-advocacy 4) But be another “set of eyes” for your client whenever possible | <p><i>“I think the relationship that you can have with your client and then maybe what you're doing in class and you look at them and see how swollen they are, you say “you know, I'm concerned, you need to check in with your midwife,” or chatting with them and seeing dark circles and them saying “I feel so tired,” ...”you need check...” -- you don't want to say “need” – but, you know, “I highly recommend you check in with your midwife it's these signs are known to be when you're very anemic.” And so I think we can help with that and being in the hospital where maybe moms aren't being listened to you to help them to have that voice.” – Emma</i></p> <p><i>“Staying with, especially hospital clients, and mother and baby for a couple hours immediately postpartum because the late onset postpartum hemorrhage is one of the biggest things that I have seen happen in a hospital setting post-delivery that, just due to the nature of having, to have more than, you know, with nurses being short staffed, especially now, and in and out of the room, they are not able to sit and watch your client as closely as you are. So staying with those clients for just a couple hours to watch them. Watch their body language, you know, help them go to the bathroom, help them do all of those things. It definitely helps. It's a second set of eyes that the hospital just can't provide due to the nature of the establishment, quite often. I still think that maternal morbidity falls within our LGBT and or BIPOC population, although I have seen it in White women as well, the levels of care are just not the same. I actually was discussing with my own personal therapist who has five kids (so she gets my level of crazy), and we were discussing birth trauma and PPD and PPA and she's telling me her story -as very educated Black woman how she was treated in New York. And I looked at her, and I said,</i></p> |

442

443

|  |  |  |                                                                                                                                                                                                                                                                                                                                                                                                                                                                                                                                                                     |
|--|--|--|---------------------------------------------------------------------------------------------------------------------------------------------------------------------------------------------------------------------------------------------------------------------------------------------------------------------------------------------------------------------------------------------------------------------------------------------------------------------------------------------------------------------------------------------------------------------|
|  |  |  | <p><i>“all I can think of is if you'd been a White woman this wouldn't have happened. And it was a late onset postpartum hemorrhage and she needed a blood transfusion and she probably needed more than one unit and she only got one unit, it was just barely enough to get her by, and now we know that a milk is made from blood and she's having nursing complications because her blood stores were low, and you know it's this downward spiral Of unnecessary tragedy. She survived. Great. Yay. Congratulations. You're alive.” [sarcasm] - Kristen</i></p> |
|--|--|--|---------------------------------------------------------------------------------------------------------------------------------------------------------------------------------------------------------------------------------------------------------------------------------------------------------------------------------------------------------------------------------------------------------------------------------------------------------------------------------------------------------------------------------------------------------------------|
